# Supplementary material for: The dynamic sustainability framework: addressing the paradox of sustainment amid ongoing change
Source: Springer Nature journal article supplement (doi:10.1186/1748-5908-8-117), 2013-10-02

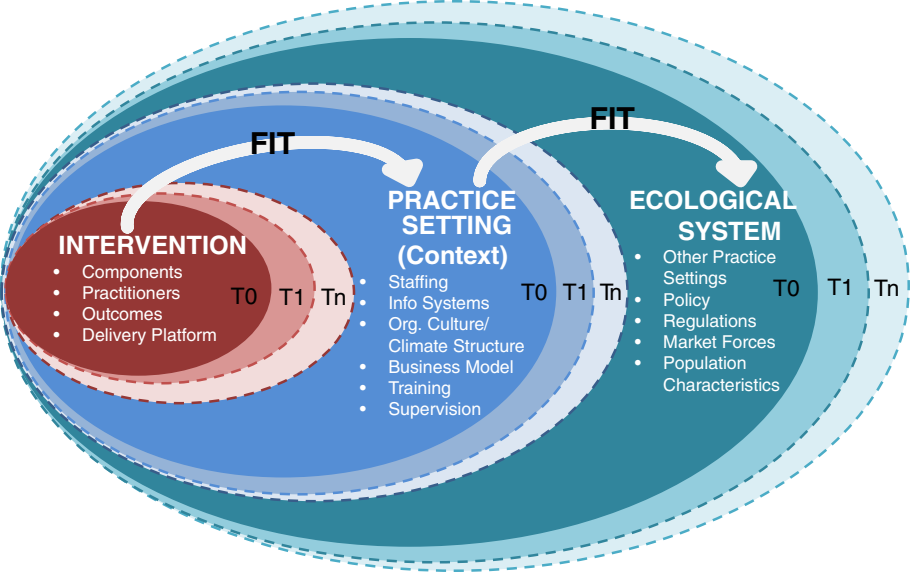

Supplement: 13012_2013_697_MOESM2_ESM.pdf [file 13012_2013_697_MOESM2_ESM.pdf]
